# Supplementary material
Source: PubMed Central journal article supplement (PMC1592550)
Supplement: NIHMS10459-supplement-2.pdf [file NIHMS10459-supplement-2.pdf]

# **SUPPORTING INFORMATION**

## **Supplementary Table 1**

a. Primers used for amplification of BC004690:

### **Nucleotides 5118-5529**

F1: 5' <TCATTCGTCTGGCCGAGATGG>3'

R1: 5' <GCTGCTGTCATTTCCGACCGAAG>3'

### **Nucleotides 4242-6368**

F2: 5' <CAATTGGCATGTGAAAATAGAAGAA>3'

R2: 5' <AAAGACTGAGAATATTTCTCCTTTGAA>3'

b. Primers used for generating probe for Southern Blot

### **Nucleotides 4805 to 5072**

F3: 5' <AAACTAAAAGAAAAAGAATCTGC>3'

R3: 5' <CTCTCTGGCCTTCTCCAGAA>3'

**SUPPLEMENTARY TABLE 2**

**Analyzer Results Blood and Urine on rd16**

**BXD-14/Ty Male DOB 6/15/05 , Specimen drawn on 9/21/05**

| Serum         |        |                      | Urine       |        |                    |
|---------------|--------|----------------------|-------------|--------|--------------------|
| Test          | Result | Normal Range         | Test        | Result | Normal Range       |
| ALT (SGPT)    | 22     | 8-84 IU/L            | Sodium      | 143.1  | 135 - 249 mmol/L** |
| Total Protein | 5.4    | 6.9 - 7.1 g/dl       | Potassium   | 202.96 | 70 - 260 mmol/L**  |
| Albumin       | 3.4    | 3.8 - 4.4 g/dl       | Chloride    | 163.3  | 112 - 184 mmol/L** |
| Calcium       | 9.5    | 10.4 - 12.0 mg/dl    | Creatinine  | 64.94  | 57 - 67 mg/dl*     |
| Phosphorous   | 7.0    | 11.9 - 13.1 mg/dl    | Micralbumin | 0.10   | <1.9 mg/dl***      |
| Glucose       | 212    | 109 - 233 mg/dl      |             |        |                    |
| BUN           | 26     | 18 - 26 mg/dl        |             |        |                    |
| Cholesterol   | 86     | 85 - 129 mg/dl       |             |        |                    |
| T4            | 5.2    | 3.8 - 7.0 ug/dl      |             |        |                    |
| Magnesium     | 2.6    | 2.4 - 3.9 mg/dl*     |             |        |                    |
| Sodium        | 149.0  | 152.5 - 178.9 mmol/L |             |        |                    |
| Potassium     | 6.18   | 5.06 - 7.50 mmol/L   |             |        |                    |
| Chloride      | 118    | 114.6 - 136.6 mmol/L |             |        |                    |
| CO2           | 17.6   | 5.1 - 11.1 mmol/L    |             |        |                    |

|                                                                                                                          |
|--------------------------------------------------------------------------------------------------------------------------|
| Normal Range established at TJL, C57BL/6J Male<br>8 Wks. Of age                                                          |
| * Normal Range from <u>The Clinical Chemistry of<br/>Laboratory Animals</u> , 2nd Edition, Loeb. Generic<br>strain & age |
| ** Rat Normal range, formal ranges for mouse not<br>yet established for urine.                                           |
| *** Human ranges, formal mouse ranges not yet<br>established.                                                            |

## **Supplementary Figure Legends:**

**Supplementary Figure 1:** Evolutionary conservation of CEP290. CLUSTAL analysis of protein sequences from different species was performed using the CLUSTALW alignment program. The CEP290 protein is conserved in evolution, with the region that is deleted in *rd16*, showing high degree of identity (blue) among mammalian species (Alignment scores between 83% and 89%). Major putative domains and motifs are represented with colored bars. The deletion removes majority of the myosin-tail homology domain and KID domains I and II.

**Supplementary Figure 2:** Immunogold labeling of CEP290 in WT mouse retina. The signal is concentrated in the connecting cilium (CC) (see inset); although some labeling is detected in the inner (IS) and outer segments (OS) as well. Quantitative analysis of the label revealed a four times higher concentration of CEP290 in the connecting cilium than that in the IS and OS of mouse retina (48). R: rootlet.

|                  |                                                               |     |
|------------------|---------------------------------------------------------------|-----|
| Mus_musculus     | MPPNIKWKELIKVDPDDLPRQEELADKLLISLSKVEVNELEKNEQENMIHLFRITQSLMK  | 60  |
| Homo_sapiens     | MPPNINWKEIMKVDPDDLPRQEELADNLLISLSKVEVNELEKSEKQENVIHLFRITQSLMK | 60  |
| Canis_familiaris | MPPNINWKEIKVDPDDLPRQEELADNLLVLSKVEISELKTESQENVIHLFRITQSLMK    | 60  |
| Danio_rerio      | MPAAADWRLLMGMDPEDLGDDEDEKICDLIL---MVKPRDLKADDSEKMIQLFRISQTLRL | 57  |
| Anoph_gambiae    | -----                                                         |     |
| Mus_musculus     | MKAQFVELALEEVEKAGEEQAKFENQLKTKVMKLENELEMAQQSAGGRDTRFLRDEIRQL  | 120 |
| Homo_sapiens     | MKAQFVELALEEVEKAGEEQAKFENQLKTKVMKLENELEMAQQSAGGRDTRFLRNEICQL  | 120 |
| Canis_familiaris | MKAQFVELALEEVEKAGEEQAKFENQLKTKVMKLENELELAQQSAGGRDTRFLRDEIRQL  | 120 |
| Danio_rerio      | MKLDEIKCAYEVVDSAGAEQARIENELKAKVLKLESELEMAQRVMGGGDKHFLRDEIRQL  | 117 |
| Anoph_gambiae    | -----KVRQLKQALVEGKDDFGSQRMKEW                                 | 25  |
| Mus_musculus     | EKQLEQKDRELEDMEKELDKKVVNEQLALRNEEAENENSKLRREN-----EQLRQDI     | 173 |
| Homo_sapiens     | EKQLEQKDRELEDMEKELEKEKKVVNEQLALRNEEAENENSKLRRENKRLKKKNEQLCQDI | 180 |
| Canis_familiaris | EKQLEQKDRELEDMEKELEKEKKVVNEQLALRNEEAENENSKLRRENKRLKKKNEQLRQDI | 180 |
| Danio_rerio      | ESHLEKKEKVTQLEKEMGKERKSNEELALRAEEAEKRNKRLKREIKQLTRKNEQLQDDI   | 177 |
| Anoph_gambiae    | KRTIEKLELERHTLRLTKLKDVTENAKLQAKLAEGHLHGS-----                 | 65  |
| Mus_musculus     | IDYQKQIDSQKESLLSRRGEDSDYRSQLSKKNYELVQYLDEIQTLTTEANEKIEVQNQEMR | 233 |
| Homo_sapiens     | IDYQKQIDSQKETLLSRRGEDSDYRSQLSKKNYELIQYLDEIQTLTTEANEKIEVQNQEMR | 240 |
| Canis_familiaris | IDYQKQIDSQKETLLSRRGEDSDYRSQLSKKNYELVQYLDEIQTLTTEANEKIEVQNQEMR | 240 |
| Danio_rerio      | EFYRKEAE-QRESLQTKE-ESNEIQRRLLKANQQLYQCMEELQHAEDMAANLRSENEHLQ  | 235 |
| Anoph_gambiae    | -----EGEDSPDALSEIERQQELYNNISMKNKHIKRLLRDIDDLEKRNNFQVDTINGLQ   | 119 |
| Mus_musculus     | KNLEESVQEMEKMTDEYNRMKALVHQSDAVMDQIKKENEHYRLQVRELTDLLKAKDEEDD  | 293 |
| Homo_sapiens     | KNLEESVQEMEKMTDEYNRMKAIVHQTDNVIDQLKKENDHYQLQVQELTDLLKSKNEEDD  | 300 |
| Canis_familiaris | KNLEESVQEMEKMTDEYNRMKAIVHQTDNVMQDKKENDHYRLQVQELTDLLKAKNEEDD   | 300 |
| Danio_rerio      | KNLEESVKEMEKMTDEYNKMKIAVQQTDAIMDQLRKRDRHAKLQVRELTQIQARVEEDD   | 295 |
| Anoph_gambiae    | VSLNDATLNLITALTHQYEELQARWSEQEELNSKLNELKQQMEGELMGVCDEKENLQEQLN | 179 |
| Mus_musculus     | PVMMAVNAKVEEWKLLILSSKDDEIEIYQQMLQSLRGLKNAQLDADKSNIMALKQGGIQR  | 353 |
| Homo_sapiens     | PIMVAVNAKVEEWKLLILSSKDDEIEIYQQMLHNLREKLNKNAQLDADKSNVMALQQGIQR | 360 |
| Canis_familiaris | PVMAAVNAKVEEWKLLILSSKDDEIEIYQQMLHNLREKLNKNAQLDADKSNVMALQQGIQR | 360 |
| Danio_rerio      | PVMAAVNAKVEEWKSVLSGKDLIEIYQQMIRDLREKLRTAQMDSKSNIALQQAVQER     | 355 |
| Anoph_gambiae    | TTRTEHTTQVAEWEVQIDQREKELNELKIRYDDLSSQFPGIDIEAERREYKLMARLEQK   | 239 |
| Mus_musculus     | DSQIKMLTEQVEQYTKEMEKNTFIEDLKNELQKDKGTSNIFYQQTHYMKIHSKVQILEEK  | 413 |
| Homo_sapiens     | DSQIKMLTEQVEQYTKEMEKNTCFIEDLKNELQRNKGASTLSQQTH-MKIQSTLDILKEK  | 419 |
| Canis_familiaris | DSQIKMLTEQVEQYTKEMEKNTFIEDLKNELHRNKGASTLSQQTHYMKIQSKVQMLEEK   | 420 |
| Danio_rerio      | DNQIKMLSEQVEQYTFEMERNAMLIEELKRLPKKDKGHS-SDHQRRLEDLQAKLQVAERK  | 414 |
| Anoph_gambiae    | DEIIVDLEQKILLTSLKEIHRSTFVMNRISEEKAR-ASQEKRQESHCCQFYRMQLEKANER | 298 |
| Mus_musculus     | TKEAERIAELAEADAREKDKELVEALKRRLKDYESGVYGLEDAVIEIKNCKAQIKIRDGEM | 473 |
| Homo_sapiens     | TKEAERTAELAEADAREKDKELVEALKRRLKDYESGVYGLEDAVVEIKNCKNQIKIRDREI | 479 |
| Canis_familiaris | TKEAERTAELAEADAREKDKELVETLKRRLKDYESGVYGLEDAVIEIKNCKNQIKIRDREI | 480 |
| Danio_rerio      | VLEAQRAAQLAERDARDKDKELNDTLRSIRLYESGTDGLEAAISEIKECKNQIRVRDREI  | 474 |
| Anoph_gambiae    | CREMQEILADVEDDNRVKSQAVEAIEALRRYENGEGLASALKKVHRLQEKVNSRDKQI    | 358 |
| Mus_musculus     | EVLTKKEINKLEMKINDILDENEALRERAGLEPKTMIDLTEFRNSKRLKQQQYRAENQVLL | 533 |
| Homo_sapiens     | EILTKEINKLELKI SDFLDENEALRERVGLEPKTMIDLTEFRNSKHLKQQQYRAENQILL | 539 |
| Canis_familiaris | EVLTKKEINKLELKINDFLDENEALRERVGLEPKTMIDLTEFRNSKSLKQQQYRAENQILL | 540 |
| Danio_rerio      | EGMIKEINQLEMKINNLLDENEDLRLRGLNPKKEELDLSEFRRSKILKQRQYKAENQVLL  | 534 |
| Anoph_gambiae    | RQLISEIN----LANEIAIENGVLKRLGIEDEDEVVATSSILAK----QKIKIAKVNERLA | 410 |
| Mus_musculus     | KEIESLEEERLDLKRKIRQMAQERGRNAASGLTIDDLNLSETFSHENKIEGRKLNFMSL   | 593 |
| Homo_sapiens     | KEIECLEEERLDLKKKIRQMAQERGRSATSGLTTEDLNLTENISQGDRI SERKLDLDSL  | 599 |

|                  |                                                               |      |
|------------------|---------------------------------------------------------------|------|
| Canis_familiaris | KEIESLEEEERLDLKKKIRQMAQERGKRAATSGLTMEDLNLTENFSQENKIGERKFDFTSL | 600  |
| Danio_rerio      | KEIERLEEEERLELQKQIRALVKDK-----GVTVVSNSLLDNSVEEK--PVRSLRPSSG   | 585  |
| Anoph_gambiae    | LKLRASEEMRLQLKLEK-----NDLNMKHCACIFRHSFSYCD                    | 448  |
| Mus_musculus     | NNMNETQSKNEFLSRELAEEKDLERSRTVIAKFQSKLKLVEENKQLEEGMKEILQAIK    | 653  |
| Homo_sapiens     | KNMSEAQSKNEFLSRELIEKERDLERSRTVIAKFQNKLKLVEENKQLEEGMKEILQAIK   | 659  |
| Canis_familiaris | KNMNEAQSKSEFLSRELTEKERDLERGRTTITKFKQNKLKLAEENKQLEEGMKEILQAIK  | 660  |
| Danio_rerio      | STDDEIKRKNERLQKELSNKEKELELRSESAQFKAKLNEMLNENKQLEQGMKEILQAIQ   | 645  |
| Anoph_gambiae    | KCVGQLQMNFDLDRPKGTSRSAETDANHHRIRELEQQYITVIEENENLREGMHEILEKLR  | 508  |
| Mus_musculus     | DMPKDSVDKGGGETSLIIPSLERLVNAMESKNAEGIFDASLHLKAQVDQLTGRN--EELRQ | 711  |
| Homo_sapiens     | EMQKDPDVKGGGETSLIIPSLERLVNAIESKNAEGIFDASLHLKAQVDQLTGRN--EELRQ | 717  |
| Canis_familiaris | EMQKDPDVKGGGETSLIIPSLERLVNAIESKNAEGIFDANLHLKAQVDQLTGRN--EELRQ | 718  |
| Danio_rerio      | DTQKKTPSTG---VSIPSLERLVNALEMKYSEKGFASLHLRQVDQLTGRN--EELRL     | 700  |
| Anoph_gambiae    | EYDAMSDRLTIDRDTLEKLLNVLVSRPMSVDANGRISKSIQSTESVNDSGNVCNEDDNSE  | 568  |
| Mus_musculus     | ELRQSRKEAVNYSQQLVKANLKHLEKETDILLRQ-SAGSNVVKYKIDLPDGIAPSSAYI   | 770  |
| Homo_sapiens     | GLRESRKEAINYSQQLAKANLKHLEKETSLLRQ-SEGSNVVFKYKIDLPDGIAPSSASI   | 776  |
| Canis_familiaris | ELRESRKEAINYSQQLAKANLKHLEKETILLRQ-SEGSNVVFKYKIDLPDGIAPSSANI   | 777  |
| Danio_rerio      | EMKTAREEAAANTLSQLTKANEKIARLESEMESMSK-STGSSIPHKTLALPEEMTPTSAEA | 759  |
| Anoph_gambiae    | SIERLEPEQIDFSEQVLLKAVEIDRLMEKNEQLRVENERLLAVQDELQVTQKLYTEMLHI  | 628  |
| Mus_musculus     | INSQNEYLIHLLQELDNKEKKLKHLEDSLEDYNRKFAVIRHQQSLLYKEYLSEKDIWKTD  | 830  |
| Homo_sapiens     | INSQNEYLIHLLQELNKEKKLKNLEDSLEDYNRKFAVIRHQQSLLYKEYLSEKETWKTE   | 836  |
| Canis_familiaris | INSQNEYLIHLLQELYKKEKKLKNLEESLEDYNRKFAVIRHQQSLLYKEYLSEKETWKTE  | 837  |
| Danio_rerio      | INALNEYTVQLLQEIKNKGDSIEQLGSALEEYKRFKFAVIRHQGGLLYKEHQSERESWQKE | 819  |
| Anoph_gambiae    | TNASENEKDRLLVQTVDR---LRDIESGVCTLQRKVDFLKAENDNLHNSLRQIKIEHLNL  | 685  |
| Mus_musculus     | SEMIREEKRKLEDQAEQDAVKVKEYNNLLSALQMDSNEMKMLSENSRKITVLQVNEKSL   | 890  |
| Homo_sapiens     | SKTIKEEKRKLEDQVQDAIKVKEYNNLLNALQMDSDMKKILAEENSRKITVLQVNEKSL   | 896  |
| Canis_familiaris | SETVKKEKKKLEDQIQQDAIKVKEYNNLLSALQMDSDMKKTLSENSRKITVLQVNEKSL   | 897  |
| Danio_rerio      | RDSFAELKSKLEEQREVDVAVKIKEYNHLETTLEKDPSEIRREMAETGRKIVVLRVNEKCL | 879  |
| Anoph_gambiae    | LHELRLQLATRSELKQPEAIDGAKGDSFDSLSDSQ---IEKLESELMRMKSEATNIYNI   | 742  |
| Mus_musculus     | IRQYTTLVEMERHLRKENGKHRNDVIAEAEVTEKLGSLQRFKEMAFKIAALQKVIDNS    | 950  |
| Homo_sapiens     | IRQYTTLVELERQLRKENEKQKNELLSMEAEVCEKIGCLQRFKEMAFKIAALQKVVDNS   | 956  |
| Canis_familiaris | IRQYTTLVEMERQLRKENGKQKNELIAEAEVGEKIGRLQRFKEMAFKIAALQKVIDNS    | 957  |
| Danio_rerio      | TRRYTTLLELEQHRLRKENAKLKEDFTQMVAVTERIGYLQRFKEMAAFKMASLQKSLDVS  | 939  |
| Anoph_gambiae    | FLKNIREVDKDHLLLEVDSKLN-QLSIVDNSLAVEFVTKDEYKRMKDRLDGLERELQREL  | 801  |
| Mus_musculus     | VSLSELELANKQYNELTTKYRDILQKDNMLVQRTSNLEHLECENASLKEQMEASKELEI   | 1010 |
| Homo_sapiens     | VSLSELELANKQYNELTAKYRDILQKDNMLVQRTSNLEHLECENISLKEQVESINKELEI  | 1016 |
| Canis_familiaris | VSLSELELANKQYNELTAKYRDVLQKDNMLVQRTSNLEHLECENSSLKEQMESINKELEI  | 1017 |
| Danio_rerio      | VPASELERANKQYTELTIKYRNLLQKDNHLVQKTTSLHLETENMSLRERIDSINKELEI   | 999  |
| Anoph_gambiae    | VKSGHLEELLKVSNEQIRSQQSLISKYSEEEVSLRHLVVDLQASANEKYLLARANKELEL  | 861  |
| Mus_musculus     | TKEKLHTIEQAWQEETKLGNDNMDKAKKSMTNSDIVSISKKITVLEMKELNERQRAEHC   | 1070 |
| Homo_sapiens     | TKEKLHTIEQAWQEETKLGNESSMDKAKKSITNSDIVSISKKITMLEMKELNERQRAEHC  | 1076 |
| Canis_familiaris | TKEKLHTIEQAWQEETKLGNESSMDKAKKSITNSEIVSISKKITMLEMKELNERQRAEHS  | 1077 |
| Danio_rerio      | SKEKLHTIEQAFENISTTGEIIMDKATKAVANSEIVSVSRRITTTLEMKELNERQRAEHA  | 1059 |
| Anoph_gambiae    | VREQEENLKLKLENSKMKLT-----LLQKLEELDNLKLRHDQQRQEFSAEQRDNKL      | 910  |
| Mus_musculus     | QKMYEHLRTSLKQMEERNFELETKFTELTKINLDAQVEQMLRDELADSVTKAVSDADRQ   | 1130 |
| Homo_sapiens     | QKMYEHLRTSLKQMEERNFELETKFAELTKINLDAQVEQMLRDELADSVKAVSDADRQ    | 1136 |
| Canis_familiaris | QKMYEHVRTSLKQVEERNFELETKFAELTKINLEAQVEQMLRDELADSVSKTVSDADRQ   | 1137 |
| Danio_rerio      | QKMYEHLRNSLKQVEERNFELETKFAELTKLNLEAQRIERELRDELADSVSKHISDADRQ  | 1119 |
| Anoph_gambiae    | KIRFLKKSLLQTLTIGHHSYLP TSAIPEFIKMYTKALELRESLTEEQRKYQHQRDEEYER | 970  |

|                  |                                                                 |       |
|------------------|-----------------------------------------------------------------|-------|
| Mus_musculus     | RILELEK----SEVELKVEVSKLREISDIAKRQVDFLNSQQQSREKEVESLRTQLLDFQA    | 1186  |
| Homo_sapiens     | RILELEK----NEMELKVEVSKLREISDIARRQVEILNAQQQSRDKVEVESLRMQLLDYQA   | 1192  |
| Canis_familiaris | RILELEK----SEMELKVEVSKLREISDIAKRQVEILKAQQQSREKEVESVRMQLLDYQA    | 1193  |
| Danio_rerio      | RITELEK----TEANLRIEVS KLREIVSDVAKMQVSALDARQQSREKEVESLRRQVLDYQA  | 1175  |
| Anoph_gambiae    | IFAKLKENLEGNHIQDKINLIKYESQSEYLTRQLLILCQEQVDQLQRENKQLRMKEIDYTR   | 1030  |
| Mus_musculus     | QSDEKALIAKHLHQHVSLQISEATALGKLESVTSK LQKMEAYNLRLEQKLDEKEQALYYA   | 1246  |
| Homo_sapiens     | QSDEKSLIAKHLQHNVSLQLSEATALGKLESITSK LQKMEAYNLRLEQKLDEKEQALYYA   | 1252  |
| Canis_familiaris | QSDEKALIAKHLHQHIVSLQISEATALGKLESVTSK LQKTEACNLRLEQKLDEKEQALYYA  | 1253  |
| Danio_rerio      | ESDEKALIAKHLHQHIVALQLSETTAISRLEATNTR LQKLEAQKLRDEQKLDEQQALWHA   | 1235  |
| Anoph_gambiae    | HWDTLELLFGEEAQRSRQDRDKYFDKAVQVAVETS SKCINTIPIIEDTLGEGPRCSSGD    | 1090  |
| Mus_musculus     | RLEGRNRAKHLRQTIQSLRRQFSGALPLAQQEKFS KTMIQ LQNDK LKIMQEMKNSQQEHR | 1306  |
| Homo_sapiens     | RLEGRNRAKHLRQTIQSLRRQFSGALPLAQQEKFS KTMIQ LQNDK LKIMQEMKNSQQEHR | 1312  |
| Canis_familiaris | RLEGRNRAKHLRQTIQSLRRQFSGALPLAQQEKFS KTMIQ LQNDK LKIMQEMKNSQQEHR | 1313  |
| Danio_rerio      | RQFGHQRARHLRHTIQALRRQFSGALPLAQQEKFS NTMLHLQEDRARVREDAQIAEEERR   | 1295  |
| Anoph_gambiae    | TISDFDGRSEHSQTGAHVNEQIAVTVHTVAQRSLES QLKQAMMLASTRSALLLEAESRLS   | 1150  |
| Mus_musculus     | NMENKTLELELKLKGLEELISTLKDARGAQKVINW HVKIEELRLQELKLNRELVKGKEEI   | 1366  |
| Homo_sapiens     | NMENKTLEMELKLKGLEELISTLKDRTKGAQKVINW HMKIEELRLQELKLNRELVKDKKEEI | 1372  |
| Canis_familiaris | SMENKTMEMELKLKGLEELISTLKDARGAQKVINW HMKIEELRLQELKLNRELVKDKKEEI  | 1373  |
| Danio_rerio      | KAEGKAQELELKLKGLEELIATLKDAGKGAQK-----                           | 1326  |
| Anoph_gambiae    | ECQGRIKLLEKSLEEKESLLKEQAQSPSTTIGS-----                          | 1183  |
| Mus_musculus     | KYLNNIISEYEHTINSLEEEIVQQSKFHEERQMAWDQ REVELERQLDIFDHQQNEILSAA   | 1426  |
| Homo_sapiens     | KYLNNIISEYERTISSLEEEIVQQNKFHEERQMAWDQ REVDLERQLDIFDRQQNEILNAA   | 1432  |
| Canis_familiaris | KYLNNIISEYEHTISSLEEEIVQQNKFHEERQMAWDQ REVELERQLDIFDHQQNEILKAA   | 1433  |
| Danio_rerio      | -----                                                           | ----- |
| Anoph_gambiae    | --LQNLLEKDTTLSRYQELLKSERSEHS-----                               | 1210  |
| Mus_musculus     | QKFEDSTGSMPPDPSLPLPNQLEIALRKIKENIQVIL KQTATCKSLEEKLKEKESALRLAE  | 1486  |
| Homo_sapiens     | QKFEEATGSIPDPSLPLPNQLEIALRKIKENIRIILE TRATCKSLEEKLKEKESALRLAE   | 1492  |
| Canis_familiaris | QKFEEATGSMPPDPSLPLPNQLEIALRKIKENVR IILETRATCKSLEEKLKEKESALRLAE  | 1493  |
| Danio_rerio      | -----                                                           | ----- |
| Anoph_gambiae    | -----QVYDENMAQIRNLKKTIDDLQKLYEK-----                            | 1237  |
| Mus_musculus     | QNILSRDKVINELRLRLPATADREKLIAELEKKELE PKSHHTMKIAHQTIANMQARLNHK   | 1546  |
| Homo_sapiens     | QNILSRDKVINELRLRLPATAEREKLI AELGRKEMEPKSHHTLTKIAHQTIANMQARLNQK  | 1552  |
| Canis_familiaris | QNILSRDKVINELRLRLPATAEREKLI AELGRKEVEPKSHHTLTKIAQQTIANMQARLNQK  | 1553  |
| Danio_rerio      | -----                                                           | ----- |
| Anoph_gambiae    | -----QKECDNIATQLNDM-----                                        | 1251  |
| Mus_musculus     | EEVLKKYQHLLLEKAREEQREIVKKHEEDLHVLH HHKLEQQADNSLNKFRQTAQDLKQSPA  | 1606  |
| Homo_sapiens     | EEVLKKYQRLLEKAREEQREIVKKHEEDLHILH HRLELQADSSLNKFKQTAWDLKQSPIT   | 1612  |
| Canis_familiaris | EEVLKKYQHLLLEKAREEQREIVKKHEEDLHILH HHLLELQADSSLNKFKQTAWDLKQSPIT | 1613  |
| Danio_rerio      | -----                                                           | ----- |
| Anoph_gambiae    | NRLKALQESVPEKPRSVEDAATGSSD-----AGA                              | 1281  |
| Mus_musculus     | PVPTNKHFIRLAEMEQTVAEQDSSLSLLITK LKKVSKDLEKQKEITELKVRREFENTKLR   | 1666  |
| Homo_sapiens     | PVPTNKHFIRLAEMEQTVAEQDSSLSLLITK LKKVSDLERQREITELKVKREFENIKLQL   | 1672  |
| Canis_familiaris | PVPTNKHFIRLAEMEQTVAEQDSSLSLLITK LKKVSDLERQKEITELKIKREFENIKLR    | 1673  |
| Danio_rerio      | -----                                                           | ----- |
| Anoph_gambiae    | IDYTDKIIENIYEIDEKKEREIQDLNVQVKMLERNV QELENEQKRLQLQLRDAN-----    | 1335  |

|                  |                                                                   |      |
|------------------|-------------------------------------------------------------------|------|
| Mus_musculus     | QETHASEVKKVKAIVEDLRHALLAQAHKDSQSLKSELQAQKEANSRAPTTTMRNLVDRLKS     | 1726 |
| Homo_sapiens     | QENHEDEVKKVKAIVEDLKYLLDQSQKESQCLKSELQAQKEANSRAPTTTMRNLVERLKS      | 1732 |
| Canis_familiaris | QENHADEVKKVKAIVEDLRCLLAHSQKESQNLKSELQAQKEANSRAPTTTMRNLVERLKS      | 1733 |
| Danio_rerio      | -----                                                             |      |
| Anoph_gambiae    | -AREKKSEKLLREKEMELVALNDRLLTKETHDLR-----EFTETIASAQEIEQLKE          | 1384 |
| Mus_musculus     | QLALKEKQOKALSRAELLELRSEMTAAAAEERIIAVTSQKEANLNVQQVVE RHTRELKSLQIE  | 1786 |
| Homo_sapiens     | QLALKEKQOKALSRAELLELRSEMTAAAAEERII SATSQKEAHLNVQQIVDRHTRELKTOVE   | 1792 |
| Canis_familiaris | QLALKEKQOKALSRAELLELRSEMTAAAAEERII SATSQKEANLNVQQIVDRHTKELKSLQID  | 1793 |
| Danio_rerio      | -----                                                             |      |
| Anoph_gambiae    | MLEEKDRHIQDLTETLSQFHEDQRSFMNDTSLHSAEQVSQLSADLNRSEASNRVLKTQIE      | 1444 |
| Mus_musculus     | DLNENLLKLKEALKTSKNKRENSIADDLNLNLDLNNELQKKQKAYNKMLREKQDGLDQENDELIR | 1846 |
| Homo_sapiens     | DLNENLLKLKEALKTSKNKRENSITDNLNLDLNNELQKKQKAYNKMLREKQEEIDQENDELIR   | 1852 |
| Canis_familiaris | DLNENLLKLKEALKTSKNKRENSISDNLNLDLNNELQKKQKAYNKMLREKQDGLDQENDELIR   | 1853 |
| Danio_rerio      | -----                                                             |      |
| Anoph_gambiae    | ALKRQIVSIQREQRSRDLVKTLLKN-----QLIKR                               | 1474 |
| Mus_musculus     | QIKRLSSGLQSKTLIDNKQSLIDELQKKVKKLESQLERKVDVDDVDIKPVPKESSTKEELIRW   | 1906 |
| Homo_sapiens     | QIKRLTSGLQSKPLTDNKQSLIEELQKRVKKLENQLEGVVEVDLKPMPKESNAKEELIRW      | 1912 |
| Canis_familiaris | QIKRLTSGLQSKPLIDNKQSLIEELQKKIKKLESQLERKVDDEAEIKPVPKESSTKEELIRW    | 1913 |
| Danio_rerio      | -----                                                             |      |
| Anoph_gambiae    | PVIAMKADRMSTPREDQLARRVQQLETELLDTKDELRL---KQTAINENRRAKTAAELDLW     | 1531 |
| Mus_musculus     | EEGKKWQTKVEGLRNRLKEKEGEAHGLAKQLNLTLLKELFAKADKEKLTQLQKKLKT'TGMTVD  | 1966 |
| Homo_sapiens     | EEGKKWQAKIEGIRNKLKEKEGEVFTLTKQLNLTLLKDLFAKADKEKLTQLQRKLT'TGMTVD   | 1972 |
| Canis_familiaris | EEGKKWQTKIEGIRNKLKEKEGEVYILTKQLNLTLLKDLFAKADKEKLSLQRKLT'TGTITVD   | 1973 |
| Danio_rerio      | -----                                                             |      |
| Anoph_gambiae    | NKQKRWQQMAERLKVQLKEREVELEKLVHFNTAKTTIARLERDRTRLN-SAGTGS GAPA      | 1590 |
| Mus_musculus     | QVLGVRALESEKELEELKKNLDLENDILYMRTOQALPRDSVVEDLHLQNKYLQEKLHRTL      | 2026 |
| Homo_sapiens     | QVLGIRALESEKELEELKKNLDLENDILYMRRAHQALPRDSVVEDLHLQNRYLQEKLHAL      | 2032 |
| Canis_familiaris | QVMGVRAFSESEKELEELKKNLDLENDISYMRSRQALPRDSVVEDLHLQNRYLQEKLHVL      | 2033 |
| Danio_rerio      | -----                                                             |      |
| Anoph_gambiae    | SLLDNKYQPSGSPDQYCSTDSTES EDTSTIT'TQMFTQNSKEIEALKSRIESQORRIIAM     | 1650 |
| Mus_musculus     | EKKLSKEKYSQSLTSEIESDDHCQKEQELQKENLKLSSENIELKFQLEQANKDLPRLLKNQ     | 2086 |
| Homo_sapiens     | EKQFSKDTYSKPSISGIESDDHCQREQELQKENLKLSSENIELKFQLEQANKDLPRLLKNQ     | 2092 |
| Canis_familiaris | EKQFSKDASSRPSTSGIESDDHFQKEQELQRENLKLSSENIELKFQLEQANKDLPRLLKSQ     | 2093 |
| Danio_rerio      | -----                                                             |      |
| Anoph_gambiae    | ELDR---KGSNTVAHELEKMQEKL CNMEAQNVRLEAKTLQLQLDNDMLRQSDESERLKRQ     | 1707 |
| Mus_musculus     | VKDLKEMCEFLKKGKLELERKLG-QVRGAGRS GKTIP ELEKTIGLMKKVVEKVQRENEQL    | 2145 |
| Homo_sapiens     | VRDLKEMCEFLKKEKAQVQRKLG-HVRGSGRS GKTIP ELEKTIGLMKKVVEKVQRENEQL    | 2151 |
| Canis_familiaris | VRDLKEMCDFLKKEKAQEVERKLG-RVRGSGRS GKTIP ELEKTIGLMKKVVEKVQRENEQL   | 2152 |
| Danio_rerio      | -----                                                             |      |
| Anoph_gambiae    | IKHLEEVIALKEEIAKATAGCPDRRS GTNDLAERNANLEQTVLTLKRMIEKLR AENKHL     | 1767 |
| Mus_musculus     | KKASGILTSEKMATIEEENRNLKAELEKLLKAHFGRQLSMQFESKNKGTEKIVAENERLRK     | 2205 |
| Homo_sapiens     | KKASGILTSEKMANIEQENEKLLKAELEKLLKAHLGHQLSMHYESKTGTEKIIAENERLRK     | 2211 |
| Canis_familiaris | KKASGILTSEKMANIELENEKLLKAELEKLLKAHLGRQLSIHYESKTGTEKIVAENERLRK     | 2212 |
| Danio_rerio      | -----                                                             |      |
| Anoph_gambiae    | KEHR-----NRERAASAESLANPPNETIAKELYDRLLKKEHEKLLQQN--LTD             | 1811 |

|                  |                                                                   |      |
|------------------|-------------------------------------------------------------------|------|
| Mus_musculus     | ELKKEIEASEKLRIAKNNLELVNDKMAAQLEETGKRLQFAESRAPQLEGADSKSWKSIVV      | 2265 |
| Homo_sapiens     | ELKKE'TDAAEKLRIAKNNLEILNEKMTVQLEETGKRLQFAESRGPQLEGADSKSWKSIVV     | 2271 |
| Canis_familiaris | ELKKETEAAEKLRIAKNNLEILNEKMTVQLEETGKRLQLAESRGPQLEGADSKSWKSIVM      | 2272 |
| Danio_rerio      | -----                                                             |      |
| Anoph_gambiae    | ALNKVSAGGNRASVER-----                                             | 1827 |
| Mus_musculus     | SRVYETKMKELES DIAKKNQSI TDLKQLVREATEREQKAKKYTEDLEQQIEILKNVPEGA    | 2325 |
| Homo_sapiens     | TRMYETKLKELETDI AKKNQSI TDLKQLVKEATEREQKVNKY NEDLEQQIKILKHVPEGA   | 2331 |
| Canis_familiaris | TRMYETKLKELETDI AKKTQSL TDLKQLVRQATEREQKAKKYTEDLEQQIAILKHVPEGA    | 2332 |
| Danio_rerio      | -----                                                             |      |
| Anoph_gambiae    | ---HVHPVQELRDKLEKKSQ LLEKAKILLQRAAAKERYLKEQIDLLRRKCSDLQNPVID      | 1884 |
| Mus_musculus     | ETEQELIRELQ LRLRAN NQMDKERAELIHQIEINKDQTRADSSIPDSDQLKEKINDLETQ    | 2385 |
| Homo_sapiens     | ETEQGLKRELQVLR LANHQLDKEKAELIHQIEANKDQSGAESTIPDADQLKEKIKDLETQ     | 2391 |
| Canis_familiaris | ETEQSLQRELQVLR LAKSQLEKEKAELIHQLEVNKDQSGAESAVSDPDQLKEKVKDLETQ     | 2392 |
| Danio_rerio      | -----                                                             |      |
| Anoph_gambiae    | EISE-----                                                         | 1888 |
| Mus_musculus     | LRKLELEKQHSKEEVK LKKELENFDP SFFEEIEDLK YNYKEEVKKNILLEEK LKKLSEQ   | 2445 |
| Homo_sapiens     | LKMSDLEKQHLKEE IKKLKKELENFDP SFFEEIEDLK YNYKEEVKKNILLEEK VKKLSEQ  | 2451 |
| Canis_familiaris | LKTS DLEKQHLKEE IKKLKKELENFDP SFFEEIEDLK YNYKEEVKKNILLEEK LRLKSEQ | 2452 |
| Danio_rerio      | -----                                                             |      |
| Anoph_gambiae    | -----                                                             |      |
| Mus_musculus     | FGFELPSPLAASEH SED-GESPHSFPIY                                     | 2472 |
| Homo_sapiens     | LGVELTSPVAASEE FEDEEESP VNFPIY                                    | 2479 |
| Canis_familiaris | CGVELTSP IAASEQFEDEGESPPNLP IY                                    | 2480 |
| Danio_rerio      | -----                                                             |      |
| Anoph_gambiae    | -----                                                             |      |

 COILED-COILS  
 HOOK Domain  
 KID Domains  
 MYO-TAIL  
 P-LOOP  
 SMC

**DELETED IN rd16**

| Name         | Amino-acids | Name             | Amino-acids | Score |
|--------------|-------------|------------------|-------------|-------|
| Mus_musculus | 1599-1897   | Homo_sapiens     | 1605-1903   | 83    |
| Mus_musculus | 1599-1897   | Canis_familiaris | 1596-1904   | 86    |
| Homo_sapiens | 1605-1903   | Canis_familiaris | 1596-1904   | 89    |

**SUPPLEMENTARY FIGURE 1**



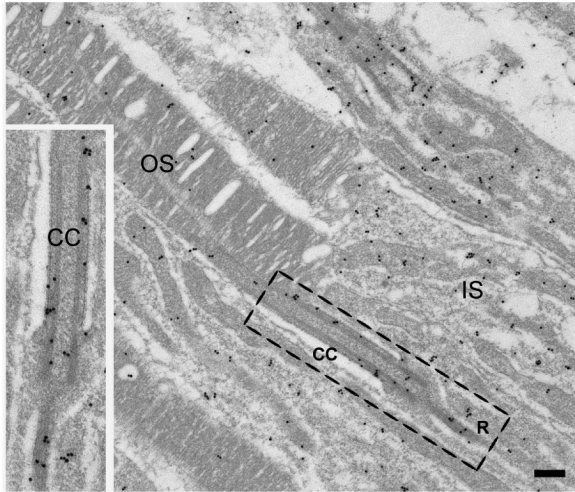

**SUPPLEMENTARY FIGURE 2**
